# Supplementary material for: The Interplay of Four Main Pathways Recomposes Immune Landscape in Primary and Metastatic Gastroenteropancreatic Neuroendocrine Tumors
Source: Front Oncol. 2022 May 18;12:808448. doi: 10.3389/fonc.2022.808448 (PMC9158120; doi:10.3389/fonc.2022.808448)
Supplement: Supplementary file 6 [file Table_1.xlsx]

## Sheet: Table S1
Supplementary Table 1: Summary of GEP-NEN signaling pathways
	Molecules
telomere maintenance	DAXX
telomere maintenance	ATRX
telomere maintenance	TERF1
telomere maintenance	ATR
telomere maintenance	SMC5
telomere maintenance	SMC6
telomere maintenance	RAD52
telomere maintenance	RAD51AP1
chromatin remodelling	SETD2
chromatin remodelling	YY1
chromatin remodelling	SMARCA4
mTOR signalling	PTEN
mTOR signalling	TSC1
mTOR signalling	TSC2
mTOR signalling	DEPDC5
mTOR signalling	PSPN
mTOR signalling	EWSR1
mTOR signalling	PIK3CA
mTOR signalling	AKT1
DNA damage repair	CHEK2
DNA damage repair	BRCA2
DNA damage repair	MUTYH
DNA damage repair	ATM
DNA damage repair	ERCC1
DNA damage repair	BRCA1
DNA damage repair	MLH3
DNA damage repair	MLH1
DNA damage repair	MSH2
DNA damage repair	MSH3
DNA damage repair	MSH4
DNA damage repair	MSH6
DNA damage repair	PMS1
DNA damage repair	MGMT
DNA damage repair	MEN1

## Sheet: Table S2
Supplementary Table 2: gene signatures used to ssGSEA
T_cell_co-inhibition	T_cell_co-stimulation	Type_I_IFN_Reponse	Type_II_IFN_Reponse	aDCs	iDCs	pDCs	cDCs	APC_co_inhibition	APC_co_stimulation	HLA	MHC_class_I	Inflammation-promoting	Parainflammation
BTLA	CD2	DDX4	GPR146	CD83	CD1A	CLEC4C	CCL17	C10orf54	CD40	HLA-E	B2M	CCL5	CXCL10
C10orf54	CD226	IFIT1	SELP	LAMP3	CD1E	CXCR3	CCL22	CD274	CD58	HLA-DPB2	HLA-A	CD19	PLAT
CD160	CD27	IFIT2	AHR	CCL1		GZMB	CD209	LGALS9	CD70	HLA-C	TAP1	CD8B	CCND1
CD244	CD28	IFIT3				IL3RA	CCL13	PDCD1LG2	ICOSLG	HLA-J		CXCL10	LGMN
CD274	CD40LG	IRF7				IRF7		PVRL3	SLAMF1	HLA-DQB1		CXCL13	PLAUR
CTLA4	ICOS	ISG20				IRF8			TNFSF14	HLA-DQB2		CXCL9	AIM2
HAVCR2	SLAMF1	MX1				LILRA4			TNFSF15	HLA-DQA2		GNLY	MMP7
LAG3	TNFRSF18	MX2				PHEX			TNFSF18	HLA-DQA1		GZMB	ICAM1
LAIR1	TNFRSF25	RSAD2				PLD4			TNFSF4	HLA-A		IFNG	MX2
TIGIT	TNFRSF4	TNFSF10				PTCRA			TNFSF8	HLA-DMA		IL12A	CXCL9
	TNFRSF8								TNFSF9	HLA-DOB		IL12B	ANXA1
	TNFRSF9									HLA-DRB1		IRF1	TLR2
	TNFSF14									HLA-H		PRF1	PLA2G2D
										HLA-B		STAT1	ITGA2
										HLA-DRB5		TBX21	MX1
										HLA-DOA			HMOX1
										HLA-DPB1			CD276
										HLA-DRA			TIRAP
										HLA-DRB6			IL33
										HLA-L			PTGES
										HLA-F			TNFRSF12A
										HLA-G			SCARB1
										HLA-DMB			CD14
										HLA-DPA1			BLNK
													IFIT3
													RETNLB
													IFIT2
													ISG15
													OAS2
													REL
													OAS3
													CD44
													PPARG
													BST2
													OAS1
													NOX1
													PLA2G2A
													IFIT1
													IFITM3
													IL1RN

## Sheet: Table S3
Supplementary Table 3: the correlation of pathways-related molecules with CYT
Molecules	Correlation of molecules with CYT	Pvalue
PTEN	0.218208	0.000935
CHEK2	0.20954	0.001499
RAD51AP1	0.117463	0.077377
BRCA2	0.117444	0.077426
SMC5	0.105134	0.114189
PSPN	0.031801	0.633642
MGMT	0.02449	0.713619
MSH4	0.023554	0.724109
MSH2	-0.00707	0.915648
BRCA1	-0.01877	0.778495
MEN1	-0.02292	0.731249
MLH3	-0.02821	0.672503
DEPDC5	-0.02881	0.665879
DAXX	-0.03897	0.55913
ERCC1	-0.06311	0.343838
MSH3	-0.07438	0.264425
ATM	-0.08173	0.219972
YY1	-0.09773	0.142165
RAD52	-0.10034	0.131761
TERF1	-0.12145	0.067781
AKT1	-0.12301	0.064284
PIK3CA	-0.1321	0.046815
EWSR1	-0.14397	0.030128
PMS1	-0.15804	0.017176
MSH6	-0.17232	0.009283
MUTYH	-0.18098	0.00625
SMC6	-0.20099	0.002345
SETD2	-0.20452	0.001954
SMARCA4	-0.20743	0.001677
MLH1	-0.28192	1.62e-05
TSC1	-0.28245	1.56e-05
TSC2	-0.28292	1.51e-05
ATRX	-0.33747	1.89e-07
ATR	-0.36223	1.92e-08
